# Supplementary material for: Prevalence of Malnutrition in People with Dementia in Long-Term Care: A Systematic Review and Meta-Analysis
Source: MDPI journal article supplement (doi:10.3390/nu15132927), 2023-06-28
Supplement: s1 [file s1]

**Supplementary Table S1. Search strategy**

|                                                                                                                                                                                                                                                                                                                                                                                                                                                                                                                                                                                                                                                                                                                                                                                                                                                                                                                                                                                                                                                                                                                                                                                                                                                                                                                                                                                                                                                                                                                                                                                                                                                                                                                                                                                                                                                                                                                                                                                                                                                                                                                                                                                                                                                                                                                                                                                                                                                                 |
|-----------------------------------------------------------------------------------------------------------------------------------------------------------------------------------------------------------------------------------------------------------------------------------------------------------------------------------------------------------------------------------------------------------------------------------------------------------------------------------------------------------------------------------------------------------------------------------------------------------------------------------------------------------------------------------------------------------------------------------------------------------------------------------------------------------------------------------------------------------------------------------------------------------------------------------------------------------------------------------------------------------------------------------------------------------------------------------------------------------------------------------------------------------------------------------------------------------------------------------------------------------------------------------------------------------------------------------------------------------------------------------------------------------------------------------------------------------------------------------------------------------------------------------------------------------------------------------------------------------------------------------------------------------------------------------------------------------------------------------------------------------------------------------------------------------------------------------------------------------------------------------------------------------------------------------------------------------------------------------------------------------------------------------------------------------------------------------------------------------------------------------------------------------------------------------------------------------------------------------------------------------------------------------------------------------------------------------------------------------------------------------------------------------------------------------------------------------------|
| <p><b>Scopus</b></p> <p>TITLE-ABS-KEY(Malnutrition OR malnourished OR undernutrition OR undernourished OR “protein-energy malnutrition” OR sarcopenia OR “risk of malnutrition” OR “weight loss” OR “prevalence of malnutrition” OR “nutritional status”) AND TITLE-ABS-KEY(“subjective global assessment” OR SGA OR “patient generated subjective global assessment” OR “PG-SGA” OR “mini nutritional assessment” OR MNA OR “mini nutritional assessment short form” OR MNA-SF OR “nutrition assessment” OR “geriatric assessment” OR “malnutrition screening”) AND TITLE-ABS-KEY(“residential aged care” OR “aged care” OR “long term care” OR “nursing home” OR “home for the ag*” OR “housing for the elderly” OR “skilled nursing facility” OR “assisted living” OR “residential care” OR “geriatric institution”)</p> <p><i>Results: 1,142</i></p>                                                                                                                                                                                                                                                                                                                                                                                                                                                                                                                                                                                                                                                                                                                                                                                                                                                                                                                                                                                                                                                                                                                                                                                                                                                                                                                                                                                                                                                                                                                                                                                                        |
| <p><b>Web of Science – Core Collection</b></p> <p>((TS=(Malnutrition OR malnourished OR undernutrition OR undernourished OR “protein-energy malnutrition” OR sarcopenia OR “risk of malnutrition” OR “weight loss” OR “prevalence of malnutrition” OR “nutritional status”)) AND TS=(“subjective global assessment” OR SGA OR “patient generated subjective global assessment” OR “PG-SGA” OR “mini nutritional assessment” OR MNA OR “mini nutritional assessment short form” OR MNA-SF OR “nutrition assessment” OR “geriatric assessment” OR “malnutrition screening”)) AND TS=(“residential aged care” OR “aged care” OR “long term care” OR “nursing home” OR “home for the ag*” OR “housing for the elderly” OR “skilled nursing facility” OR “assisted living” OR “residential care” OR “geriatric institution”))</p> <p><i>Results: 501</i></p>                                                                                                                                                                                                                                                                                                                                                                                                                                                                                                                                                                                                                                                                                                                                                                                                                                                                                                                                                                                                                                                                                                                                                                                                                                                                                                                                                                                                                                                                                                                                                                                                         |
| <p><b>CINAHL Plus with full text</b></p> <p>S1<br/>MH ( Malnutrition OR malnourished OR undernutrition OR undernourished OR “protein-energy malnutrition” OR sarcopenia OR “risk of malnutrition” OR “weight loss” OR “prevalence of malnutrition” OR “nutritional status” ) OR TI ( Malnutrition OR malnourished OR undernutrition OR undernourished OR “protein-energy malnutrition” OR sarcopenia OR “risk of malnutrition” OR “weight loss” OR “prevalence of malnutrition” OR “nutritional status” ) OR AB ( Malnutrition OR malnourished OR undernutrition OR undernourished OR “protein-energy malnutrition” OR sarcopenia OR “risk of malnutrition” OR “weight loss” OR “prevalence of malnutrition” OR “nutritional status” )</p> <p>S2<br/>MH ( “subjective global assessment” OR SGA OR “patient generated subjective global assessment” OR “PG-SGA” OR “mini nutritional assessment” OR MNA OR “mini nutritional assessment short form” OR MNA-SF OR “nutrition assessment” OR “geriatric assessment” OR “malnutrition screening” ) OR TI ( “subjective global assessment” OR SGA OR “patient generated subjective global assessment” OR “PG-SGA” OR “mini nutritional assessment” OR MNA OR “mini nutritional assessment short form” OR MNA-SF OR “nutrition assessment” OR “geriatric assessment” OR “malnutrition screening” ) OR AB ( “subjective global assessment” OR SGA OR “patient generated subjective global assessment” OR “PG-SGA” OR “mini nutritional assessment” OR MNA OR “mini nutritional assessment short form” OR MNA-SF OR “nutrition assessment” OR “geriatric assessment” OR “malnutrition screening” )</p> <p>S3<br/>MH ( “residential aged care” OR “aged care” OR “long term care” OR “nursing home” OR “home for the ag*” OR “housing for the elderly” OR “skilled nursing facility” OR “assisted living” OR “residential care” OR “geriatric institution*” ) OR TI ( “residential aged care” OR “aged care” OR “long term care” OR “nursing home” OR “home for the ag*” OR “housing for the elderly” OR “skilled nursing facility” OR “assisted living” OR “residential care” OR “geriatric institution*” ) OR AB ( “residential aged care” OR “aged care” OR “long term care” OR “nursing home” OR “home for the ag*” OR “housing for the elderly” OR “skilled nursing facility” OR “assisted living” OR “residential care” OR “geriatric institution*” )</p> <p>Together – search with AND:<br/>S1 AND S2 AND S3</p> |

Results: 320

**MEDLINE**

S1

MH ( Malnutrition OR malnourished OR undernutrition OR undernourished OR “protein-energy malnutrition” OR sarcopenia OR “risk of malnutrition” OR “weight loss” OR “prevalence of malnutrition” OR “nutritional status” ) OR AB ( Malnutrition OR malnourished OR undernutrition OR undernourished OR “protein-energy malnutrition” OR sarcopenia OR “risk of malnutrition” OR “weight loss” OR “prevalence of malnutrition” OR “nutritional status” ) OR TI ( Malnutrition OR malnourished OR undernutrition OR undernourished OR “protein-energy malnutrition” OR sarcopenia OR “risk of malnutrition” OR “weight loss” OR “prevalence of malnutrition” OR “nutritional status” )

S2

MH ( “subjective global assessment” OR SGA OR “patient generated subjective global assessment” OR “PG-SGA” OR “mini nutritional assessment” OR MNA OR “mini nutritional assessment short form” OR MNA-SF OR “nutrition assessment” OR “geriatric assessment” OR “malnutrition screening” ) OR AB ( “subjective global assessment” OR SGA OR “patient generated subjective global assessment” OR “PG-SGA” OR “mini nutritional assessment” OR MNA OR “mini nutritional assessment short form” OR MNA-SF OR “nutrition assessment” OR “geriatric assessment” OR “malnutrition screening” ) OR TI ( “subjective global assessment” OR SGA OR “patient generated subjective global assessment” OR “PG-SGA” OR “mini nutritional assessment” OR MNA OR “mini nutritional assessment short form” OR MNA-SF OR “nutrition assessment” OR “geriatric assessment” OR “malnutrition screening” )

S3

MH ( “residential aged care” OR “aged care” OR “long term care” OR “nursing home” OR “home for the ag\*” OR “housing for the elderly” OR “skilled nursing facility” OR “assisted living” OR “residential care” OR “geriatric institution\*” ) OR AB ( “residential aged care” OR “aged care” OR “long term care” OR “nursing home” OR “home for the ag\*” OR “housing for the elderly” OR “skilled nursing facility” OR “assisted living” OR “residential care” OR “geriatric institution\*” ) OR TI ( “residential aged care” OR “aged care” OR “long term care” OR “nursing home” OR “home for the ag\*” OR “housing for the elderly” OR “skilled nursing facility” OR “assisted living” OR “residential care” OR “geriatric institution\*” )

S1 AND S2 AND S3

Results: 618

**Supplementary Table S2: Quality assessment of included studies [26]**

| Author, Year            | Class | Quality Rating (*) | Q1 | Q2  | Q3  | Q4  | Q5  | Q6  | Q7  | Q8 | Q9  | Q10 |
|-------------------------|-------|--------------------|----|-----|-----|-----|-----|-----|-----|----|-----|-----|
| Arellano 2004           | D     | Neutral            | Y  | U/C | N/A | N   | N/A | N   | Y   | N  | N   | U/C |
| Bolmsjo 2015            | B     | Positive           | Y  | Y   | Y   | Y   | N/A | Y   | Y   | Y  | Y   | Y   |
| Bonaccorsi 2015         | D     | Positive           | Y  | Y   | Y   | N/A | N/A | Y   | Y   | Y  | Y   | Y   |
| Bourdel-Marchasson 2009 | D     | Neutral            | Y  | U/C | Y   | N/A | N/A | U/C | Y   | Y  | Y   | U/C |
| Cankurtaran 2013        | D     | Positive           | Y  | Y   | Y   | N/A | N/A | Y   | Y   | Y  | Y   | Y   |
| Cereda 2011             | B     | Positive           | Y  | Y   | Y   | Y   | N/A | Y   | Y   | Y  | Y   | Y   |
| Chang 2011              | D     | Positive           | Y  | Y   | Y   | N/A | N/A | Y   | Y   | Y  | Y   | Y   |
| Elsig 2015              | D     | Positive           | Y  | Y   | Y   | N/A | N/A | Y   | Y   | Y  | Y   | Y   |
| Elzoghbi 2014           | D     | Positive           | Y  | Y   | Y   | Y   | N/A | Y   | Y   | Y  | Y   | Y   |
| GilGregorio 2003        | A     | Neutral            | Y  | Y   | U/C | N   | N/A | N   | Y   | Y  | N   | U/C |
| Kamo 2017               | B     | Positive           | Y  | Y   | U/C | Y   | N/A | No  | Y   | Y  | Y   | U/C |
| Keser 2016              | D     | Positive           | Y  | Y   | Y   | N/A | N/A | Y   | Y   | Y  | Y   | U/C |
| Lauque 2000             | A     | Positive           | Y  | Y   | Y   | Y   | N   | Y   | Y   | Y  | N   | U/C |
| Lin 2017                | B     | Neutral            | Y  | U/C | N/A | N   | N/A | N   | Y   | Y  | U/C | U/C |
| Maltais 2018            | A     | Positive           | Y  | Y   | Y   | Y   | Y   | Y   | Y   | Y  | Y   | U/C |
| Muurinen 2015           | D     | Positive           | Y  | Y   | Y   | N/A | N/A | N/A | Y   | Y  | Y   | Y   |
| Salminen 2019           | D     | Positive           | Y  | Y   | N/A | U/C | N/A | N/A | Y   | Y  | Y   | Y   |
| Sliwinski 2013          | D     | Neutral            | Y  | U/C | N/A | N/A | N/A | N/A | Y   | Y  | Y   | Y   |
| Suominen 2004           | D     | Positive           | Y  | Y   | N/A | N/A | N/A | N/A | Y   | Y  | Y   | Y   |
| Suominen 2007           | D     | Neutral            | Y  | U/C | N/A | U/C | U/C | N   | U/C | Y  | Y   | Y   |
| Vandewoude 2019         | D     | Positive           | Y  | Y   | N/A | U/C | U/C | N/A | Y   | Y  | Y   | Y   |
| Wojszel 2006            | D     | Positive           | Y  | U/C | N/A | Y   | N   | N/A | Y   | Y  | Y   | Y   |
| Yap 2019                | D     | Positive           | Y  | Y   | N/A | Y   | U/C | N/A | Y   | Y  | Y   | Y   |
| Ziebolz 2017            | D     | Positive           | Y  | Y   | N/A | Y   | Y   | N/A | Y   | Y  | Y   | Y   |

Legend: Y – Yes, N – No, N/A – Not applicable, U/C – Unclear, \* – Indicates hierarchy and class of studies Q1: Was the research question clearly stated?; Q2: Was the selection of study subjects/patients free from bias?; Q3: Were study groups comparable?; Was method of handling withdrawals described?; Q5: Was blinding used to prevent introduction of bias?; Q6: Were intervention/therapeutic regimes/exposure factor or procedure and any comparison(s) described in detail? Were intervening factors described?; Q7: Were outcomes clearly defined and the measurements valid and reliable?; Q8: Was the statistical analysis appropriate for the study design and type of outcome indicators?; Q9: Are conclusions supported by results with biases and limitations taken into consideration?; Q10: Is bias due to study's funding or sponsorship unlikely?
